# Supplementary material
Source: PubMed Central journal article supplement (PMC3908866)
Supplement: NIHMS502664-supplement-supplement_1.pdf [file NIHMS502664-supplement-supplement_1.pdf]

Appendix Figure 1. Study flow diagram for doctors.

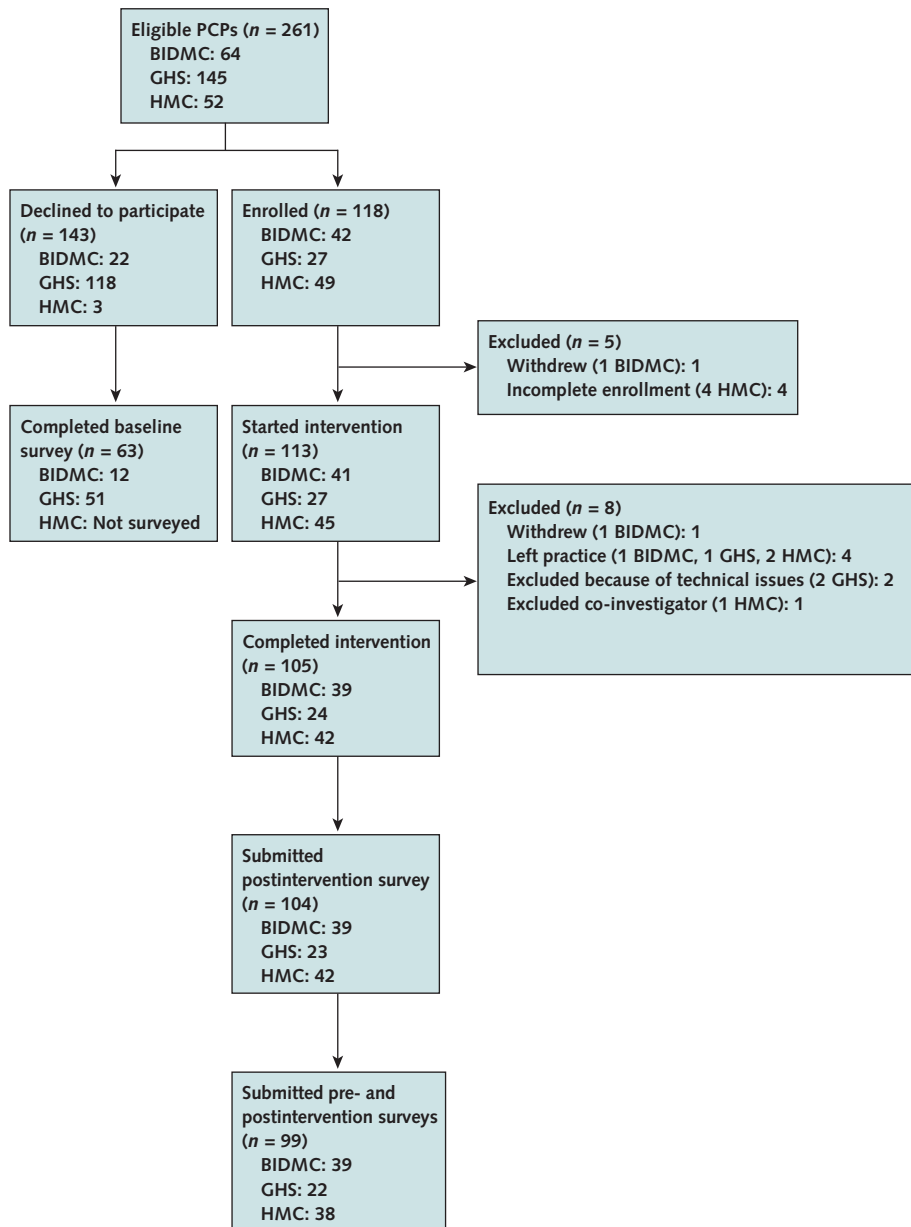

BIDMC = Beth Israel Deaconess Medical Center; GHS = Geisinger Health System; HMC = Harborview Medical Center; PCP = primary care physician.

Appendix Figure 2. Study flow diagram for patients.

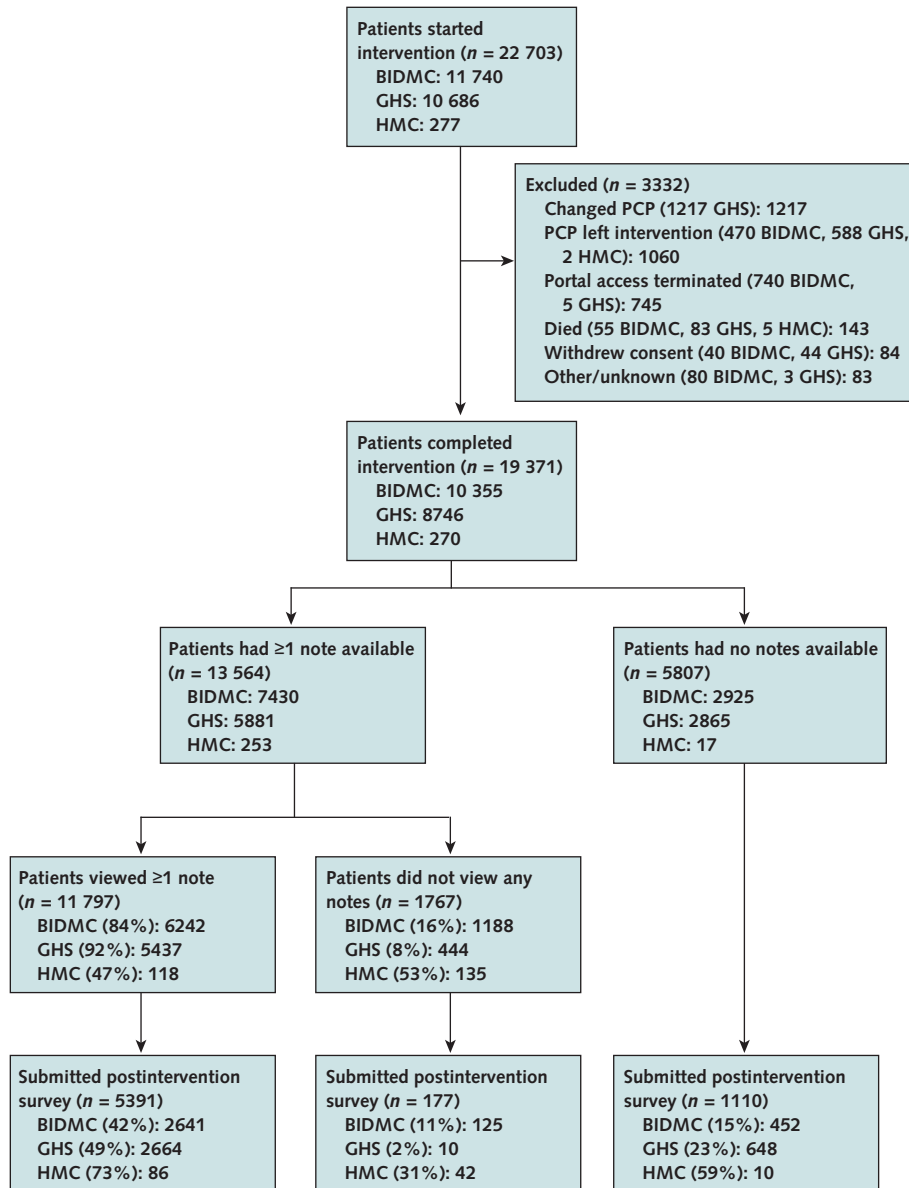

BIDMC = Beth Israel Deaconess Medical Center; GHS = Geisinger Health System; HMC = Harborview Medical Center; PCP = primary care physician.

Appendix Table 1. Characteristics of 19 371 Patients Who Completed the Intervention, by Study Site

| Patient Characteristic                    | BIDMC<br>(n = 10 355)           |                                 |                                     | GHS<br>(n = 8746) |                                 |                                | HMC<br>(n = 270)                    |         |                                |                                |                                   |         |
|-------------------------------------------|---------------------------------|---------------------------------|-------------------------------------|-------------------|---------------------------------|--------------------------------|-------------------------------------|---------|--------------------------------|--------------------------------|-----------------------------------|---------|
|                                           | Opened<br>≥1 Note<br>(n = 6242) | Opened<br>0 Notes<br>(n = 1188) | No Notes<br>Available<br>(n = 2925) | P Value           | Opened<br>≥1 Note<br>(n = 5437) | Opened<br>0 Notes<br>(n = 444) | No Notes<br>Available<br>(n = 2865) | P Value | Opened<br>≥1 Note<br>(n = 118) | Opened<br>0 Notes<br>(n = 135) | No Notes<br>Available<br>(n = 17) | P Value |
| Mean age (SD)<br>[range], n*              | 51 (13) [18–100]                | 49 (14) [20–95]                 | 44 (13) [19–99]                     | <0.001            | 53 (14) [18–99]                 | 53 (17) [18–90]                | 41 (13) [18–91]                     | <0.001  | 50 (10) [27–72]                | 48 (11) [25–85]                | 47 (14) [28–75]                   | 0.025   |
| Women, %†                                 | 60                              | 58                              | 54                                  | <0.001            | 55                              | 56                             | 60                                  | <0.001  | 21                             | 24                             | 24                                | 0.83    |
| Mean notes available<br>(SD) [range], n*‡ | 4 (4) [1–55]                    | 3 (3) [1–29]                    | –                                   | <0.001            | 3 (2) [1–18]                    | 2 (2) [1–14]                   | –                                   | 0.021   | 5 (3) [1–17]                   | 5 (3) [1–21]                   | –                                 | 0.001   |
| Notes available, %†                       | 58                              | 75                              | –                                   | <0.001            | 78                              | 81                             | –                                   | 0.164   | 28                             | 35                             | –                                 | 0.24    |
| ≥4                                        | 42                              | 25                              | –                                   |                   | 22                              | 19                             | –                                   |         | 72                             | 65                             | –                                 |         |

BIDMC = Beth Israel Deaconess Medical Center; GHS = Geisinger Health System; HMC = Harborview Medical Center.

\* Group differences were assessed using analysis of variance.

† Group differences were assessed using the chi-square test.

‡ All sites opened visit notes, and BIDMC also opened notes documenting letters and phone calls.

**Appendix Table 2. PCPs' Matched Pre- and Postintervention Survey Responses at BIDMC\***

| Pre-/Postintervention Response Statement                                                               | BIDMC (n = 39), % |                    |                           |                       |                    |                              |
|--------------------------------------------------------------------------------------------------------|-------------------|--------------------|---------------------------|-----------------------|--------------------|------------------------------|
|                                                                                                        | Agree/<br>Agree   | Agree/<br>Disagree | Agree/<br>Cannot Estimate | Disagree/<br>Disagree | Disagree/<br>Agree | Disagree/<br>Cannot Estimate |
| Visits will/did take significantly longer                                                              | 0                 | 23                 | –                         | 74                    | 3                  | –                            |
| Will/did spend more time addressing patient questions outside of visits†                               | 0                 | 31                 | 18                        | 26                    | 5                  | 20                           |
| Will/did spend more time writing/dictating/editing my notes                                            | 21                | 26                 | –                         | 54                    | 0                  | –                            |
| Will be/was less candid in documentation I will/did change the way I address these topics in my notes: | 15                | 18                 | –                         | 54                    | 13                 | –                            |
| Cancer/possibility of cancer                                                                           | 18                | 15                 | –                         | 59                    | 8                  | –                            |
| Mental health                                                                                          | 31                | 13                 | –                         | 51                    | 5                  | –                            |
| Substance abuse                                                                                        | 20                | 18                 | –                         | 54                    | 8                  | –                            |
| Overweight/obesity                                                                                     | 13                | 5                  | –                         | 62                    | 20                 | –                            |
| Medical care will be/was delivered more efficiently                                                    | 10                | 13                 | –                         | 67                    | 10                 | –                            |
| Notes can be useful for patient communication and education                                            | 72                | 5                  | –                         | 13                    | 10                 | –                            |

BIDMC = Beth Israel Deaconess Medical Center; PCP = primary care physician.

\* Rows total 100%.

† Postintervention surveys asked PCPs to estimate how many of their patients read their notes; those responding “none” or “cannot estimate . . .” were not asked this question.

**Appendix Table 3. PCPs' Matched Pre- and Postintervention Survey Responses at GHS\***

| Pre-/Postintervention Response Statement                                                               | GHS (n = 22)†, % |                    |                           |                       |                    |                              |
|--------------------------------------------------------------------------------------------------------|------------------|--------------------|---------------------------|-----------------------|--------------------|------------------------------|
|                                                                                                        | Agree/<br>Agree  | Agree/<br>Disagree | Agree/<br>Cannot Estimate | Disagree/<br>Disagree | Disagree/<br>Agree | Disagree/<br>Cannot estimate |
| Visits will/did take significantly longer                                                              | 5                | 27                 | –                         | 68                    | 0                  | –                            |
| Will/did spend more time addressing patient questions outside of visits‡                               | 0                | 32                 | 14                        | 36                    | 0                  | 18                           |
| Will/did spend more time writing/dictating/editing my notes                                            | 9                | 27                 | –                         | 59                    | 5                  | –                            |
| Will be/was less candid in documentation I will/did change the way I address these topics in my notes: | 5                | 27                 | –                         | 63                    | 5                  | –                            |
| Cancer/possibility of cancer                                                                           | 9                | 9                  | –                         | 73                    | 9                  | –                            |
| Mental health                                                                                          | 18               | 9                  | –                         | 64                    | 9                  | –                            |
| Substance abuse                                                                                        | 9                | 23                 | –                         | 54                    | 14                 | –                            |
| Overweight/obesity                                                                                     | 0                | 18                 | –                         | 77                    | 5                  | –                            |
| Medical care will be/was delivered more efficiently                                                    | 14               | 14                 | –                         | 54                    | 18                 | –                            |
| Notes can be useful for patient communication and education                                            | 85               | 5                  | –                         | 5                     | 5                  | –                            |

GHS = Geisinger Health System; PCP = primary care physician.

\* Rows total 100%.

† Participating PCPs who did not submit both pre- and postintervention surveys were excluded from analysis (n = 2).

‡ Postintervention surveys asked PCPs to estimate how many of their patients read their notes; those responding “none” or “cannot estimate . . .” were not asked this question.

**Appendix Table 4. PCPs' Matched Pre- and Postintervention Survey Responses at HMC\***

| Pre-/Postintervention Response Statement                                 | HMC (n = 38)†, % |                    |                           |                       |                    |                              |
|--------------------------------------------------------------------------|------------------|--------------------|---------------------------|-----------------------|--------------------|------------------------------|
|                                                                          | Agree/<br>Agree  | Agree/<br>Disagree | Agree/<br>Cannot Estimate | Disagree/<br>Disagree | Disagree/<br>Agree | Disagree/<br>Cannot Estimate |
| Visits will/did take significantly longer                                | 0                | 21                 | –                         | 79                    | 0                  | –                            |
| Will/did spend more time addressing patient questions outside of visits‡ | 0                | 18                 | 16                        | 40                    | 0                  | 26                           |
| Will/did spend more time writing/dictating/editing my notes              | 0                | 34                 | –                         | 66                    | 0                  | –                            |
| Will be/was less candid in documentation                                 | 3                | 37                 | –                         | 52                    | 8                  | –                            |
| I will/did change the way I address these topics in my notes:            |                  |                    |                           |                       |                    |                              |
| Cancer/possibility of cancer                                             | 0                | 26                 | –                         | 71                    | 3                  | –                            |
| Mental health                                                            | 5                | 48                 | –                         | 42                    | 5                  | –                            |
| Substance abuse                                                          | 3                | 39                 | –                         | 53                    | 5                  | –                            |
| Overweight/obesity                                                       | 3                | 18                 | –                         | 76                    | 3                  | –                            |
| Medical care will be/was delivered more efficiently                      | 8                | 29                 | –                         | 60                    | 3                  | –                            |
| Notes can be useful for patient communication and education              | 84               | 0                  | –                         | 13                    | 3                  | –                            |

HMC = Harborview Medical Center; PCP = primary care physician.

\* Rows total 100%.

† Participating PCPs who did not submit both pre- and postintervention surveys were excluded from analysis (n = 4).

‡ Postintervention surveys asked PCPs to estimate how many of their patients read their notes; those responding “none” or “cannot estimate . . .” were not asked this question.
